# Supplementary material for: Differential Effects of Senescence on the Phloem Exports of Cadmium and Zinc from Leaves to Grains in Rice during Grain Filling
Source: MDPI journal article supplement (doi:10.3390/plants12091902), 2023-05-06
Supplement: s1 [file s1]

## Supporting information

**Supplementary Table S1.** Amount of total Cd and Zn in each organ harvested at 6 DAA (after anthesis) and at 15 DAA (after anthesis) in rice. Values are means  $\pm$  standard error of 4 independent replicates.

| Harvest         | Cd amount ( $\mu\text{g}$ ) |                   |                   | Zn amount ( $\mu\text{g}$ ) |                        |                        |
|-----------------|-----------------------------|-------------------|-------------------|-----------------------------|------------------------|------------------------|
|                 | 6 DAA                       | 15 DAA            |                   | 6 DAA                       | 15 DAA                 |                        |
|                 | 6 DAA                       | CK                | ABA               | 6 DAA                       | CK                     | ABA                    |
| Grains          | 0.00* $\pm$ 0.00            | 0.12 $\pm$ 0.02 a | 0.13 $\pm$ 0.03 a | 1.33 $\pm$ 0.94             | 32.11 $\pm$ 5.22 a     | 30.42 $\pm$ 4.73 a     |
| H+R             | 0.12 $\pm$ 0.05             | 0.10 $\pm$ 0.04 a | 0.12 $\pm$ 0.03 a | 38.06 $\pm$ 3.18            | 15.18 $\pm$ 1.87 a     | 21.76 $\pm$ 3.61 b     |
| Flag leaves     | 1.53 $\pm$ 0.19             | 1.65 $\pm$ 0.11 a | 1.02 $\pm$ 0.15 b | 21.82 $\pm$ 4.8             | 11.11 $\pm$ 0.81 a     | 13.68 $\pm$ 3.20 a     |
| Node-I          | 0.00* $\pm$ 0.00            | 0.02 $\pm$ 0.00 a | 0.01 $\pm$ 0.00 a | 6.49 $\pm$ 0.75             | 11.10 $\pm$ 0.68 a     | 15.98 $\pm$ 0.53 b     |
| Stems           | 0.04 $\pm$ 0.01             | 0.08 $\pm$ 0.01 a | 0.08 $\pm$ 0.03 a | 65.24 $\pm$ 10.91           | 49.40 $\pm$ 6.88 a     | 80.64 $\pm$ 9.71 b     |
| Lower leaves    | 0.21 $\pm$ 0.03             | 0.97 $\pm$ 0.57 a | 0.32 $\pm$ 0.07 a | 65.16 $\pm$ 4.44            | 27.70 $\pm$ 3.92 a     | 37.89 $\pm$ 6.40 a     |
| Other tillers   | 0.46 $\pm$ 0.05             | 0.73 $\pm$ 0.28 a | 1.17 $\pm$ 0.20 a | 244.29 $\pm$ 40.64          | 214.03 $\pm$ 9.21 a    | 330.21 $\pm$ 15.83 b   |
| Roots           | 1.92 $\pm$ 0.58             | 3.39 $\pm$ 0.47 a | 2.05 $\pm$ 0.33 a | 476.19 $\pm$ 148.15         | 739.54 $\pm$ 162.47 a  | 507.42 $\pm$ 102.56 b  |
| Labeling tiller | 1.91 $\pm$ 0.15             | 2.95 $\pm$ 0.46 a | 1.69 $\pm$ 0.18 a | 198.10 $\pm$ 15.41          | 146.59 $\pm$ 12.55 a   | 200.38 $\pm$ 17.57 a   |
| Straw           | 2.37 $\pm$ 0.20             | 3.56 $\pm$ 0.57 a | 2.73 $\pm$ 0.37 a | 441.06 $\pm$ 55.12          | 328.52 $\pm$ 16.10 a   | 500.17 $\pm$ 30.10 b   |
| Shoots          | 2.37 $\pm$ 0.20             | 3.68 $\pm$ 0.58 a | 2.86 $\pm$ 0.36 a | 442.39 $\pm$ 56.06          | 360.62 $\pm$ 19.12 a   | 530.60 $\pm$ 28.92 b   |
| Whole plant     | 4.29 $\pm$ 0.79             | 7.08 $\pm$ 1.00 a | 4.92 $\pm$ 0.56 a | 918.58 $\pm$ 92.09          | 1100.16 $\pm$ 156.10 a | 1038.01 $\pm$ 160.86 a |

Whole plant was the sum of the dry weight of each organ. Shoot, total aboveground biomass. Labeling tiller, total aboveground biomass of labeling tiller. Straw, the total amount of aboveground parts except grains. H+R, husk+rachis. \* The value is very small, and it is 0 after two decimal places. For each element, different letters within a row indicate significant differences ( $p < 0.05$ ).

**Supplementary Table S2.** Cd<sub>lab</sub> and Zn<sub>lab</sub> absorption in flag leaves during 24 hours. Values are means ± standard error of 4 independent replicates.

|     | Amount of Cd <sub>lab</sub><br>before treatments (µg) | Amount of Zn <sub>lab</sub><br>before treatments (µg) |
|-----|-------------------------------------------------------|-------------------------------------------------------|
| CK  | 0.82±0.03                                             | 1.20±0.16                                             |
| ABA |                                                       |                                                       |

**Supplementary Table S3.** The amount Cd<sub>lab</sub> and Zn<sub>lab</sub> among the rice in two treatments at 6 DAA (after anthesis) and at 15 DAA (after anthesis). Values are means  $\pm$  standard error of 4 independent replicates.

|               | Amount of Cd <sub>lab</sub> ( $\mu\text{g Cd}_{\text{lab}} \text{ plant}^{-1}$ ) |                 |                  |
|---------------|----------------------------------------------------------------------------------|-----------------|------------------|
|               | 6 DAA                                                                            | 15DAA           |                  |
|               | 6 DAA                                                                            | CK              | ABA              |
| Grains        | 0.001                                                                            | 0.06 $\pm$ 0.01 | 0.05 $\pm$ 0.01  |
| H+R           | <i>n.d.</i>                                                                      | 0.05 $\pm$ 0.03 | 0.03 $\pm$ 0.02  |
| Node-I        | 0.0002                                                                           | 0.01 $\pm$ 0.01 | 0.004 $\pm$ 0.00 |
| Stems         | <i>n.d.</i>                                                                      | 0.01 $\pm$ 0.00 | 0.02 $\pm$ 0.01  |
| Lower leaves  | <i>n.d.</i>                                                                      | <i>n.d.</i>     | <i>n.d.</i>      |
| Other tillers | <i>n.d.</i>                                                                      | <i>n.d.</i>     | <i>n.d.</i>      |
| Roots         | <i>n.d.</i>                                                                      | <i>n.d.</i>     | <i>n.d.</i>      |
| Flag leaves   | 0.82 $\pm$ 0.03                                                                  | 0.70 $\pm$ 0.04 | 0.72 $\pm$ 0.09  |
|               | Amount of Zn <sub>lab</sub> ( $\mu\text{g Zn}_{\text{lab}} \text{ plant}^{-1}$ ) |                 |                  |
|               | 6 DAA                                                                            | 15DAA           |                  |
|               | 6 DAA                                                                            | CK              | ABA              |
| Grains        | 0.0003                                                                           | 0.03 $\pm$ 0.01 | 0.04 $\pm$ 0.01  |
| H+R           | 0.02 $\pm$ 0.01                                                                  | 0.06 $\pm$ 0.02 | 0.04 $\pm$ 0.01  |
| Node-I        | 0.22 $\pm$ 0.02                                                                  | 0.34 $\pm$ 0.03 | 0.55 $\pm$ 0.04  |
| Stems         | 0.04 $\pm$ 0.02                                                                  | 0.09 $\pm$ 0.02 | 0.10 $\pm$ 0.03  |
| Lower leaves  | 0.11 $\pm$ 0.02                                                                  | 0.13 $\pm$ 0.04 | 0.11 $\pm$ 0.01  |
| Other tillers | 0.23 $\pm$ 0.07                                                                  | 0.39 $\pm$ 0.05 | 0.32 $\pm$ 0.04  |
| Roots         | 0.10 $\pm$ 0.05                                                                  | 0.21 $\pm$ 0.05 | 0.23 $\pm$ 0.07  |
| Flag leaves   | 1.20 $\pm$ 0.16                                                                  | 0.38 $\pm$ 0.03 | 0.39 $\pm$ 0.03  |

H+R, husk+rachis. *n.d.* Zn<sub>lab</sub> and Cd<sub>lab</sub> under detection limit. *ns* stands for no significant difference.

**Supplementary Table S4.** Isotopic abundances of Cd and Zn (data from the isotope certificate).

| isotope            | <sup>106</sup> Cd | <sup>108</sup> Cd | <sup>110</sup> Cd | <sup>111</sup> Cd | <sup>112</sup> Cd | <sup>113</sup> Cd | <sup>114</sup> Cd | <sup>116</sup> Cd |
|--------------------|-------------------|-------------------|-------------------|-------------------|-------------------|-------------------|-------------------|-------------------|
| Labled source (%)  | 0.01              | 0.02              | 1.39              | 97.21             | 1.28              | 0.07              | 0.01              | 0.01              |
| Natural source (%) | 1.25              | 0.89              | 12.49             | 12.80             | 24.13             | 12.22             | 28.73             | 7.49              |
| isotope            | <sup>64</sup> Zn  | <sup>66</sup> Zn  | <sup>67</sup> Zn  | <sup>68</sup> Zn  | <sup>70</sup> Zn  |                   |                   |                   |
| Labled source(%)   | 1.56              | 3.88              | 89.6              | 4.91              | 0.05              |                   |                   |                   |
| Natural source (%) | 48.63             | 27.90             | 4.10              | 18.75             | 0.62              |                   |                   |                   |

**Supplementary Table S5.** Primers for qRT-PCR.

| Primer name | Primer sequence (5'to3')  |
|-------------|---------------------------|
| F-OsLCT1    | GAGTTCTTCGTCAGAGCTAC      |
| R-OsLCT1    | CAGTGCTGGATGACGAATTG      |
| F-OsHMA2    | CATAGTGAAGCTGCCTGAGATC    |
| R-OsHMA2    | GATCAAACGCATAGCAGCATCG    |
| F-OsZIP3    | GCATTGTTTCAGGCTAATTTTAAGG |
| R-OsZIP3    | GGCAGTTGAGCTATGCACATTG    |
| F-Actin1    | GGGTTCACAAAGTCTGCCTATTGT  |
| R-Actin1    | ACGGGACACGACCAAGGA        |

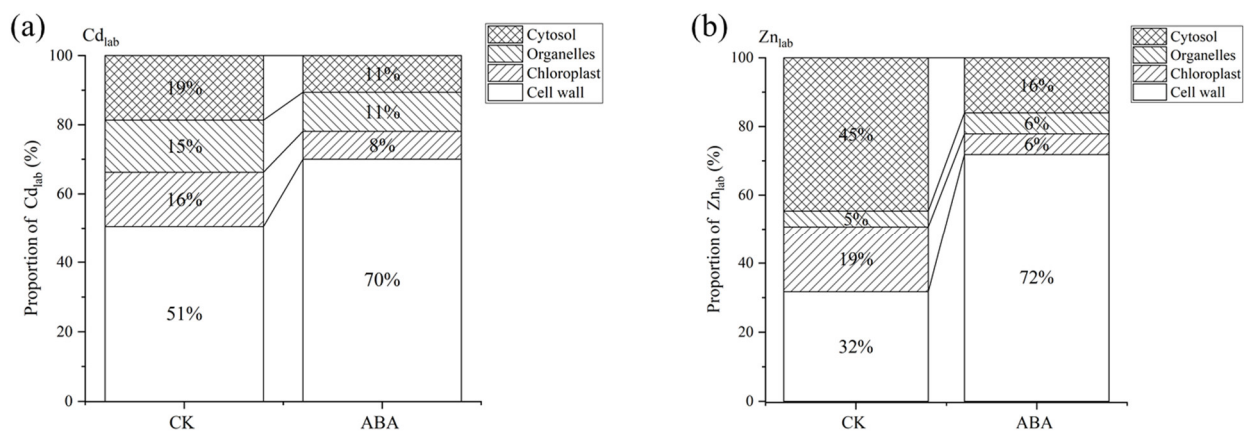

**Supplementary Figure S1.** Subcellular distribution proportion of Cd<sub>lab</sub> (a) and Zn<sub>lab</sub> (b) in flag leaves of rice at 15DAA (after anthesis). ABA, Absciscic Acid. CK, blank control. Cd<sub>lab</sub>/Zn<sub>lab</sub>, the labeled source of Cd/Zn with an enriched <sup>111</sup>Cd /<sup>67</sup>Zn isotope. Data are mean values calculated from 4 independent replicates.
